# Supplementary material
Source: Springer Nature journal article supplement (https://www.springermedizin.de/resource/supplementary/12936_2011_1689_MOESM2_ESM.pdf/9541510)
Supplement: MOESM2 [file 9541510]

|     |                                                           |        |
|-----|-----------------------------------------------------------|--------|
| 754 | GEAKLTNGEGKLTNGEAKLTNGEGKLTNGEAKLTNGEGKLTNGDAKLTNGDSKLTNG | Type A |
| 754 | GEAKLTNGEGKLTNGEAKLTNGEGKLTNG-----DSKLTNG                 | Type B |
| 754 | GEAKLTNGEGKLTNGEAKLTNGEGKLTN-----GDAKLTNGDSKLTNG          | Type C |
| 754 | GEAKLTNGEGKLTNGEAKLTNGEGKLTNGEAKLTNGEGKLTN-----GDSKLTNG   | Type D |
| 754 | GEAKLTNGEGKLTNG-----DSKLTNG                               | Type E |
| 754 | GEAKLTNGEGKLTNGEAKLTN-----GEAKLTNGEGKLTNGDAKLTNGDSKLTNG   | Type F |
| 754 | GEAKLTNGEGKLTNGE-----GKLTNGEAKLTNGEGKLTN-----GDSKLTNG     | Type G |
| 754 | GEAKLTNGEGKLTNGEGKLTNGEGKLTNGEAKLTNG-----DSKLTNG          | Type H |
